# Supplementary material for: Combination of temozolomide with immunocytokine F16–IL2 for the treatment of glioblastoma
Source: PubMed Central journal article supplement (PMC2966626; doi:10.1038/sj.bjc.6605832), 2010-08-24

## Subcutaneous Tumors

**A**

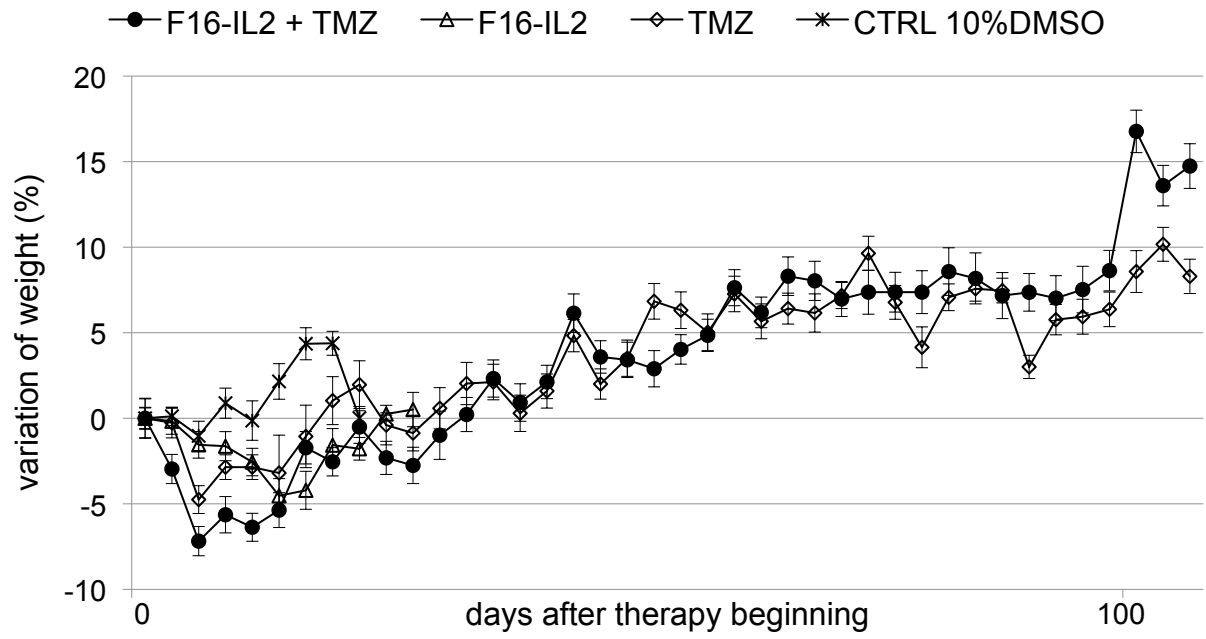

## Intracranial Tumors

**B**

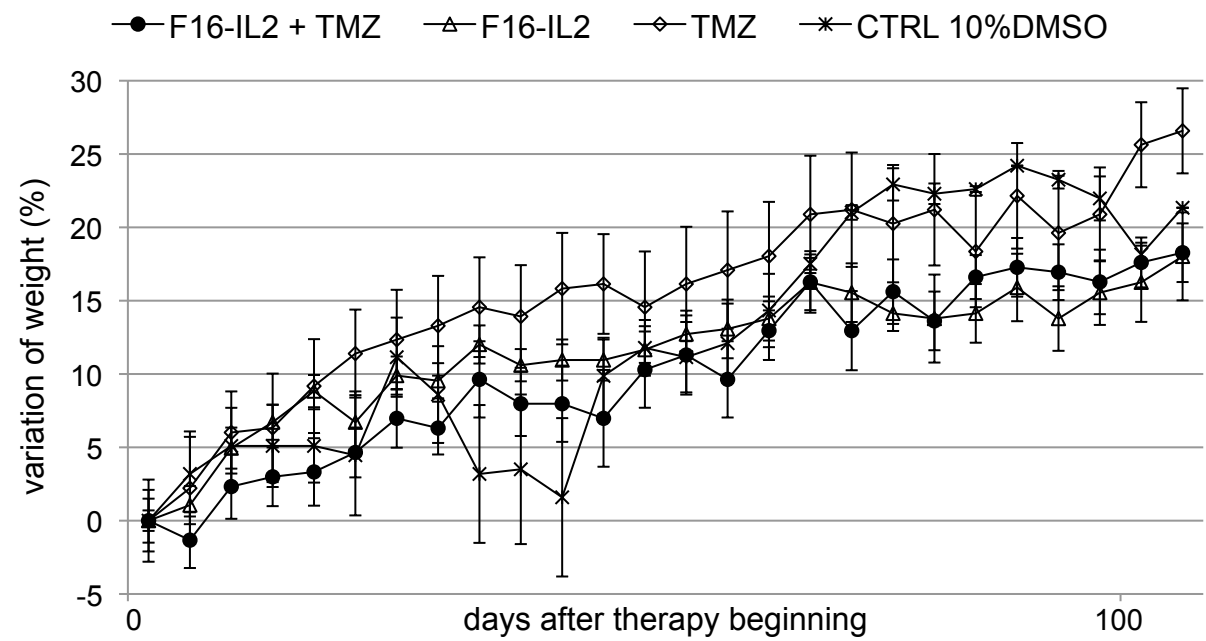

Supplement: 6605832x2.pdf [file 6605832x2.pdf]
