# Supplementary material for: Combination of temozolomide with immunocytokine F16–IL2 for the treatment of glioblastoma
Source: PubMed Central journal article supplement (PMC2966626; doi:10.1038/sj.bjc.6605832), 2010-08-24

■ F16-IL2 + TMZ ■ F16-IL2 ■ TMZ ■ CTRL 10%DMSO

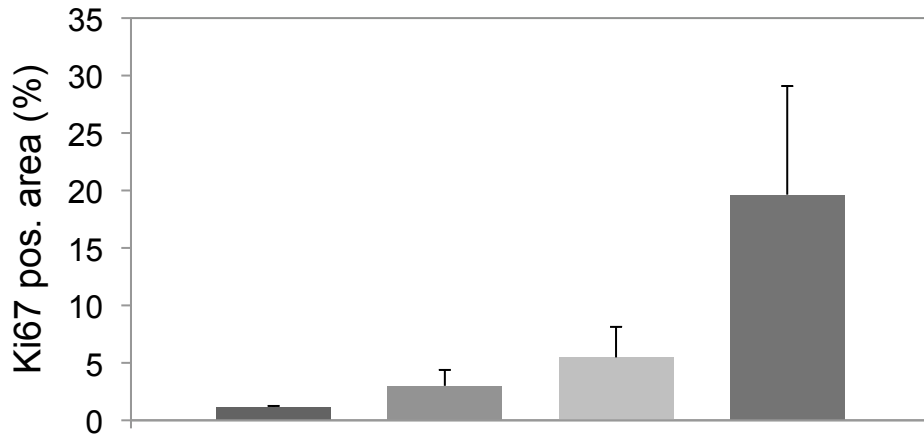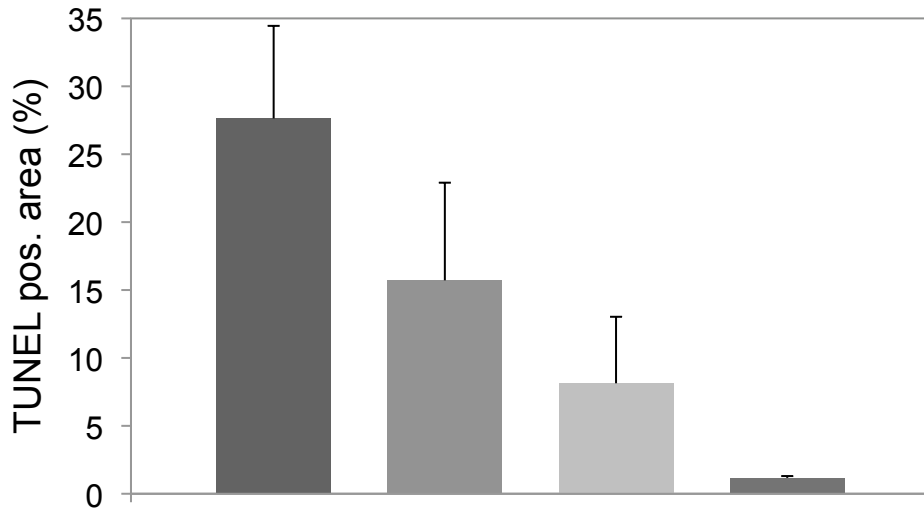

Supplement: 6605832x6.pdf [file 6605832x6.pdf]
